# Supplementary material
Source: Springer Nature journal article supplement (https://www.springermedizin.de/resource/supplementary/12874_2010_644_MOESM4_ESM.pdf/9432286)
Supplement: MOESM4 [file 9432286]

## *Risk Factors*

Age  
Sick person contact  
Immunization  
Water exposure

0.9

0.5

0.3

0.2

x

$$\rho = 0.71^*$$

y

0.5

0.5

0.5

0.4

0.4

0.3

0.3

## *Symptoms*

Abnormal WCC  
Headache  
Confusion  
Abnormal protein  
PB change  
Length of stay  
Duration of illness
